# Supplementary material
Source: PubMed Central journal article supplement (PMC8744337)
Supplement: 13059_2021_2589_MOESM1_ESM.pdf [file 13059_2021_2589_MOESM1_ESM.pdf]

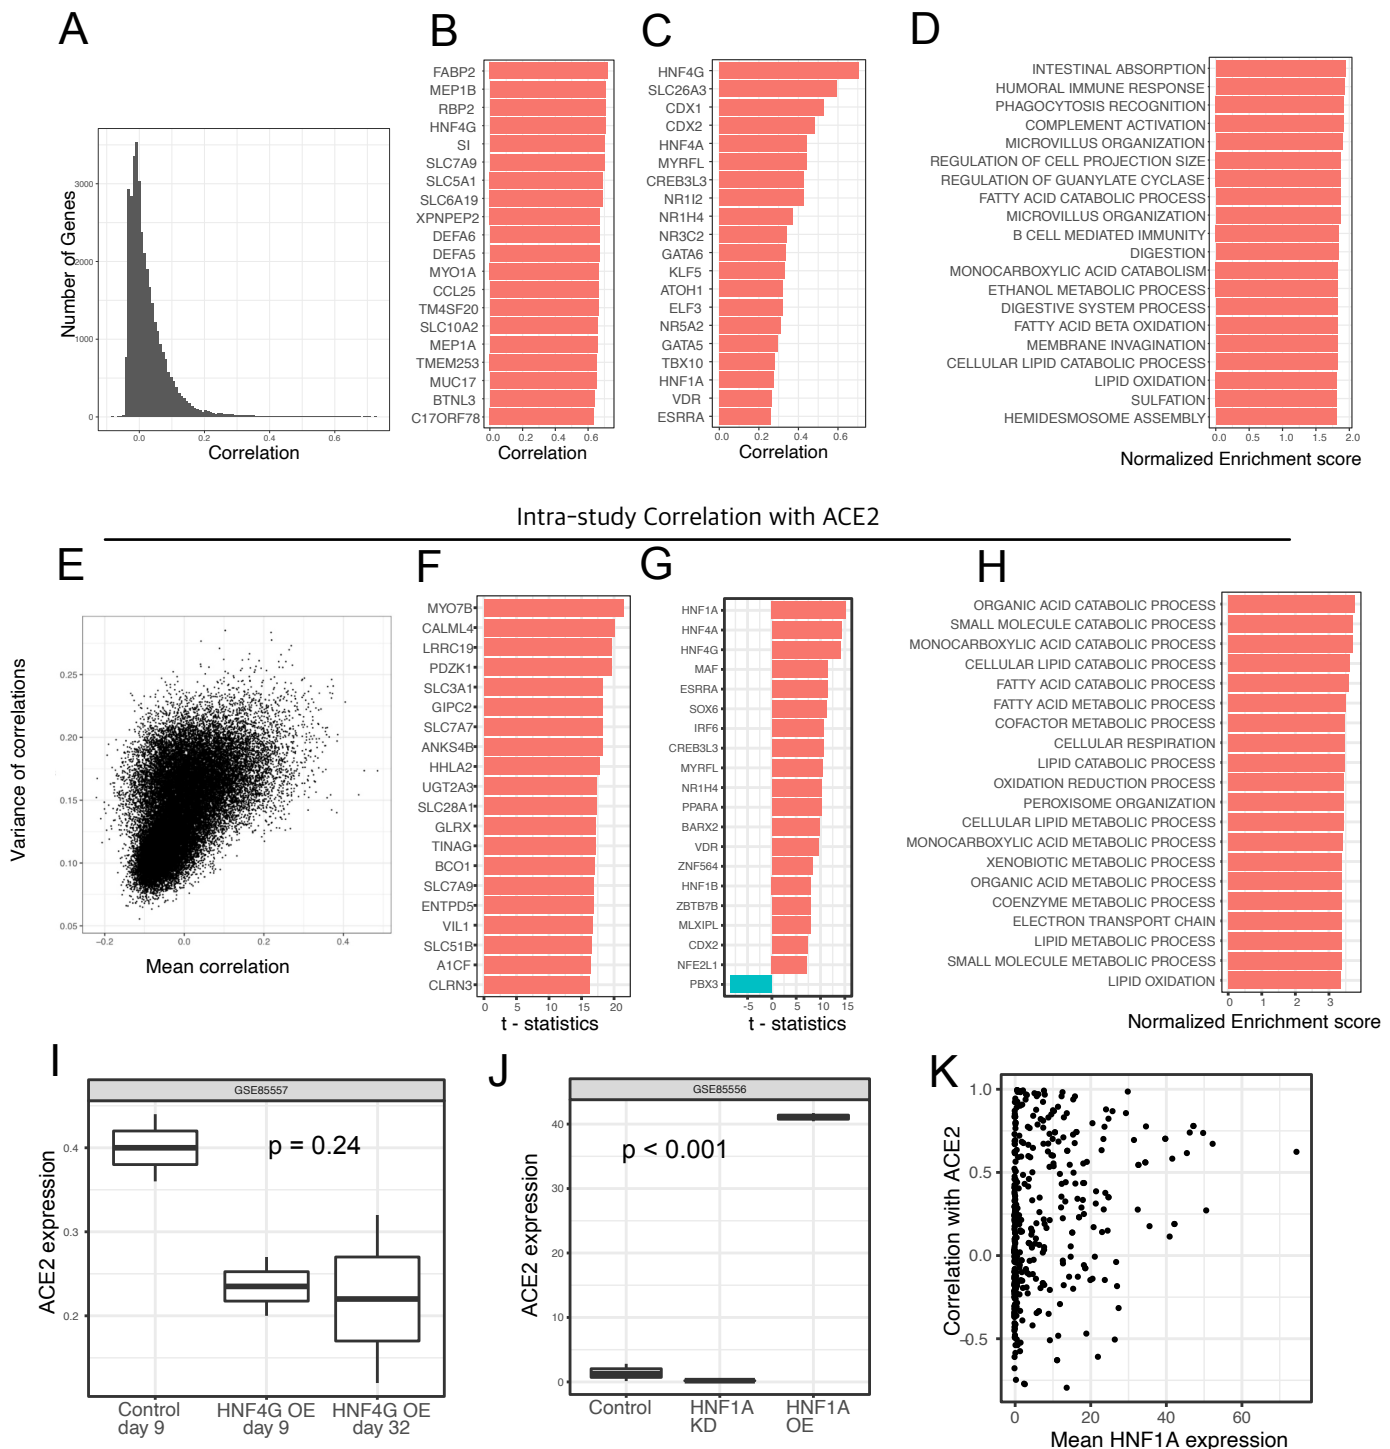

Figure S1: RNA-seq analysis reveals complex transcriptional networks of ACE2. We calculated the pairwise Pearson correlations between ACE2 and other genes using all data from 286650 RNA-seq samples (A-D). (A) Histogram of the pairwise correlations. (B) Top 30 genes with the highest correlation with ACE2. (C) Top 30 transcription factors with the highest correlation with ACE2. (D) Top 30 pathways correlated with ACE2 expression. We calculated the pairwise Pearson correlations between ACE2 and other genes using samples in individual datasets (E-H). (E) Scatter plot shows the mean and variance of the correlation between ACE2 and other genes across different datasets. (F) Top 30 genes with the highest association (measured by the t statistics from mix-effect models that control for study differences) with ACE2. (G) Top 30 transcription factors with the highest association (measured by the t statistics from mix-effect models that control for study differences) with ACE2. (H) Top 30 pathways with the highest associations with ACE2. (I) Box plot showing the expression of ACE2 in LNCaP/AR cells with or without HNF4G over expression. (I) Box plot showing the expression of ACE2 in LNCaP/AR cells with or without HNF4A over expression or knock down. (K) scatter plot shows the relationship between HNF4G expression level and its correlation with ACE2.

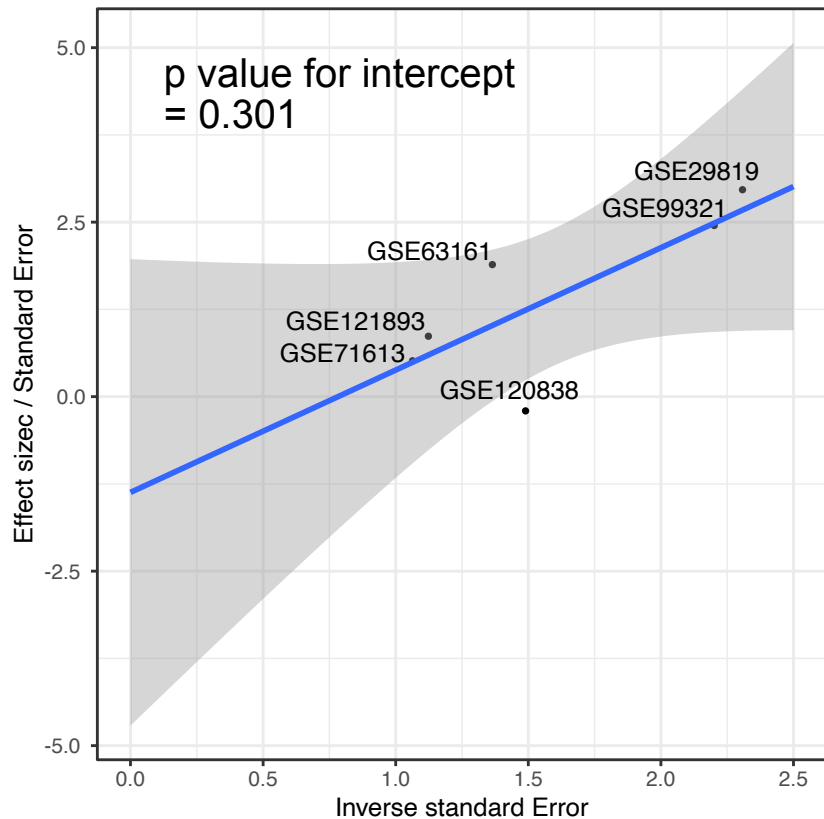

Figure S2: Test the publication bias in the cardiomyopathy-related datasets using Egger regression.

|                                           | pre-existing<br>cardiomyopathy<br>(N=43) | Other cardiovascular<br>diseases<br>(N=344) | Overall<br>(N=387) |
|-------------------------------------------|------------------------------------------|---------------------------------------------|--------------------|
| <b>age</b>                                |                                          |                                             |                    |
| Mean (SD)                                 | 58.6 (17.9)                              | 57.9 (19.7)                                 | 58.0 (19.5)        |
| Median [Min, Max]                         | 60.0 [18.0, 89.0]                        | 60.5 [0, 100]                               | 60.0 [0, 100]      |
| <b>gender</b>                             |                                          |                                             |                    |
| Female                                    | 10 (23.3%)                               | 95 (27.6%)                                  | 105 (27.1%)        |
| Male                                      | 33 (76.7%)                               | 249 (72.4%)                                 | 282 (72.9%)        |
| <b>race</b>                               |                                          |                                             |                    |
| Asian                                     | 12 (27.9%)                               | 77 (22.4%)                                  | 89 (23.0%)         |
| Black or African American                 | 5 (11.6%)                                | 33 (9.6%)                                   | 38 (9.8%)          |
| MultiRace                                 | 1 (2.3%)                                 | 9 (2.6%)                                    | 10 (2.6%)          |
| Native Hawaiian or Other Pacific Islander | 3 (7.0%)                                 | 13 (3.8%)                                   | 16 (4.1%)          |
| Unknown                                   | 9 (20.9%)                                | 74 (21.5%)                                  | 83 (21.4%)         |
| White                                     | 13 (30.2%)                               | 138 (40.1%)                                 | 151 (39.0%)        |
| <b>hyperlipidemia</b>                     |                                          |                                             |                    |
| Yes                                       | 27 (62.8%)                               | 195 (56.7%)                                 | 222 (57.4%)        |
| No                                        | 16 (37.2%)                               | 149 (43.3%)                                 | 165 (42.6%)        |
| <b>diabetes</b>                           |                                          |                                             |                    |
| Yes                                       | 27 (62.8%)                               | 184 (53.5%)                                 | 211 (54.5%)        |
| No                                        | 16 (37.2%)                               | 160 (46.5%)                                 | 176 (45.5%)        |
| <b>cancer</b>                             |                                          |                                             |                    |
| Yes                                       | 10 (23.3%)                               | 81 (23.5%)                                  | 91 (23.5%)         |
| No                                        | 33 (76.7%)                               | 263 (76.5%)                                 | 296 (76.5%)        |
| <b>ventilator use</b>                     |                                          |                                             |                    |
| Yes                                       | 24 (55.8%)                               | 90 (26.2%)                                  | 114 (29.5%)        |
| No                                        | 19 (44.2%)                               | 254 (73.8%)                                 | 273 (70.5%)        |
| <b>respiratory failure</b>                |                                          |                                             |                    |
| Yes                                       | 12 (27.9%)                               | 62 (18.0%)                                  | 74 (19.1%)         |
| No                                        | 31 (72.1%)                               | 282 (82.0%)                                 | 313 (80.9%)        |
| <b>chest pain</b>                         |                                          |                                             |                    |
| Yes                                       | 27 (62.8%)                               | 125 (36.3%)                                 | 152 (39.3%)        |
| No                                        | 16 (37.2%)                               | 219 (63.7%)                                 | 235 (60.7%)        |
| <b>death</b>                              |                                          |                                             |                    |
| Yes                                       | 3 (7.0%)                                 | 4 (1.2%)                                    | 7 (1.8%)           |
| No                                        | 40 (93.0%)                               | 340 (98.8%)                                 | 380 (98.2%)        |

**Table S8: Demographic and clinical information of COVID-19 patients with cardiomyopathy and a propensity score matched cohort of COVID-19 patients with other cardiovascular diseases**

|                                           | Cardiomyopathy<br>(N=2250) | Other cardiovascular diseases<br>(N=18000) | Overall<br>(N=20250) |
|-------------------------------------------|----------------------------|--------------------------------------------|----------------------|
| <b>age</b>                                |                            |                                            |                      |
| Mean (SD)                                 | 45.9 (23.3)                | 46.4 (24.1)                                | 46.3 (24.0)          |
| Median [Min, Max]                         | 50.0 [0, 90.0]             | 51.0 [0, 91.0]                             | 51.0 [0, 91.0]       |
| <b>gender</b>                             |                            |                                            |                      |
| FEMALE                                    | 897 (39.9%)                | 7238 (40.2%)                               | 8135 (40.2%)         |
| MALE                                      | 1352 (60.1%)               | 10758 (59.8%)                              | 12110 (59.8%)        |
| UNKNOWN                                   | 1 (0.0%)                   | 4 (0.0%)                                   | 5 (0.0%)             |
| <b>race</b>                               |                            |                                            |                      |
| American Indian or Alaska Native          | 9 (0.4%)                   | 73 (0.4%)                                  | 82 (0.4%)            |
| Asian                                     | 200 (8.9%)                 | 1526 (8.5%)                                | 1726 (8.5%)          |
| Black or African American                 | 190 (8.4%)                 | 1539 (8.6%)                                | 1729 (8.5%)          |
| MultiRace                                 | 122 (5.4%)                 | 1018 (5.7%)                                | 1140 (5.6%)          |
| Native Hawaiian or Other Pacific Islander | 27 (1.2%)                  | 195 (1.1%)                                 | 222 (1.1%)           |
| Other Race                                | 382 (17.0%)                | 3172 (17.6%)                               | 3554 (17.6%)         |
| Unknown                                   | 335 (14.9%)                | 2449 (13.6%)                               | 2784 (13.7%)         |
| White                                     | 985 (43.8%)                | 8028 (44.6%)                               | 9013 (44.5%)         |
| <b>hyperlipidemia</b>                     |                            |                                            |                      |
| Yes                                       | 368 (16.4%)                | 2945 (16.4%)                               | 3313 (16.4%)         |
| No                                        | 1882 (83.6%)               | 15055 (83.6%)                              | 16937 (83.6%)        |
| <b>diabetes</b>                           |                            |                                            |                      |
| Yes                                       | 370 (16.4%)                | 2874 (16.0%)                               | 3244 (16.0%)         |
| No                                        | 1880 (83.6%)               | 15126 (84.0%)                              | 17006 (84.0%)        |
| <b>cancer</b>                             |                            |                                            |                      |
| Yes                                       | 306 (13.6%)                | 2430 (13.5%)                               | 2736 (13.5%)         |
| No                                        | 1944 (86.4%)               | 15570 (86.5%)                              | 17514 (86.5%)        |
| <b>death</b>                              |                            |                                            |                      |
| Yes                                       | 123 (5.5%)                 | 807 (4.5%)                                 | 930 (4.6%)           |
| No                                        | 2127 (94.5%)               | 17193 (95.5%)                              | 19320 (95.4%)        |

**Table S9: Demographic and clinical information of Non-COVID-19 patients with cardiomyopathy and a propensity score matched cohort of patients with other cardiovascular diseases**
